# Supplementary material
Source: MDPI journal article supplement (https://www.mdpi.com/2071-1050/9/12/2337)
Supplement: s1 [file s1]

## **Author's Reply to the Academic Editors comments**

Thank you very much for spending time on this manuscript and for your observations. Following your comments, we have made careful considerations. The work was rewritten in some parts and reorganized. The changes in the text are highlighted in yellow.

In particular, in order to improve readability we extended and clarified the method section (3) adding further description of the adopted methods and the performed analyses. Moreover, in this new revised version, we moved the sentence that explain the time directions considered, in Introduction section (See line 81- 89).
